# Supplementary material for: Influence of Additional White, Red and Far-Red Light on Growth, Secondary Metabolites and Expression of Hormone Signaling Genes in Scots Pine under Sunlight
Source: MDPI journal article supplement (doi:10.3390/cells13020194), 2024-01-19
Supplement: s1 [file s1]

Table S1. Primers for genes

| №  | Gene Bank ID     | Gene Description                                 | Gene                              | Primer 5'-3'             |                         |
|----|------------------|--------------------------------------------------|-----------------------------------|--------------------------|-------------------------|
|    |                  |                                                  |                                   | forward                  | reverse                 |
| 1  | ALN42232.1       | Histidine-containing phosphotransfer 1           | <i>HPT1</i>                       | GCTCAAGTATAGGAGCGCGG     | CCAGCTTGTTTTTACGAGGT    |
| 2  | EF083399.1       | Jasmonate-Zim domain 1                           | <i>JAZa</i>                       | GGTGAACGTGTATGATGATATTCC | CGTTGCAGAGAATGCTTCCTC   |
| 3  | AY289600.1       | Auxin-induced protein 1 (IAA1)                   | <i>AUX/IAA</i>                    | GCCACCTGTCAAAGATTTCAG    | TGAGGTCCACCTTTCTGAGA    |
| 4  | CBB44933.1       | Actin 1                                          | <i>ACT1</i>                       | TTAGCAACTGGGATGACATGGA   | CCTGAATGGCAACATACATAGCA |
| 5  | KY914544.1       | auxin response factor 16                         | <i>ARF16</i>                      | TATATACCGTGGCACACCGC     | ACACACAGCTCCCCATTGAG    |
| 6  | A9NWW4           | Steroid 5- $\alpha$ -reductase DET2              | <i>BR-<math>\alpha</math>-RED</i> | CAACAGAGCTCTCAAGGCGA     | GAAGAGTAGGGCGCTCATCC    |
| 7  | MH017214.1       | Brassinosteroid mediated signaling pathway gene  | <i>BRZ2</i>                       | GCGTCTATGAGCCCATCCTC     | CGGCGAGATTTTTCAGCCAG    |
| 8  | JQ240296.1       | Monoterpene synthase like TPS-mono1              | <i>mono-TERP</i>                  | GGAGTATCCACCAGTCCCCT     | TCCAATGCCTTTCTCGGTCC    |
| 9  | JQ240308.1       | $\alpha$ -terpineol synthase TPS- $\alpha$ -terp | <i><math>\alpha</math>-TERP</i>   | AGCATCGAACGTTTGGGAGT     | AAGAGTTCGAAGGCCCAGTG    |
| 10 | MA_10426264g0020 | Chalcone synthase                                | <i>CHS</i>                        | GGCATTGAGGAAGGCTCAGAGA   | GGCACCTCCACCACAACCAT    |
| 11 | FN433184.1       | Auxin response factor 3/4                        | <i>ARF3/4</i>                     | CGTGGCTCCTTCCTCAACAT     | TGGTCGGCGTGTAGATTGAC    |
| 12 | L26923.1         | Glyceraldehyde-phosphate dehydrogenase           | <i>GAPDH</i>                      | GACCCAGATGTGCAGGTAGC     | GTCAACAAACACGCCAGGTC    |

**Table S2.** Gene expression of Scots pine saplings

| Genes                          | Control                  | Additional light          |                           |                           |                          |
|--------------------------------|--------------------------|---------------------------|---------------------------|---------------------------|--------------------------|
|                                |                          | WL                        | RL                        | FRL                       | RL+FRL                   |
| current-year needles           |                          |                           |                           |                           |                          |
| ARF16                          | 1.00 ± 0.00 <sup>d</sup> | 0.90 ± 0.05 <sup>d</sup>  | 4.72 ± 0.10 <sup>c</sup>  | 4.98 ± 0.12 <sup>b</sup>  | 9.01 ± 0.09 <sup>a</sup> |
| AUX/IAA                        | 1.00 ± 0.00 <sup>c</sup> | 0.66 ± 0.02 <sup>d</sup>  | 4.07 ± 0.46 <sup>b</sup>  | 0.61 ± 0.02 <sup>d</sup>  | 8.12 ± 0.10 <sup>a</sup> |
| JAZa                           | 1.00 ± 0.00 <sup>d</sup> | 1.35 ± 0.08 <sup>c</sup>  | 6.21 ± 0.55 <sup>b</sup>  | 0.10 ± 0.03 <sup>e</sup>  | 8.74 ± 0.50 <sup>a</sup> |
| HPT1                           | 1.00 ± 0.00 <sup>b</sup> | 1.32 ± 0.10 <sup>ab</sup> | 0.88 ± 0.05 <sup>b</sup>  | 1.08 ± 0.08 <sup>b</sup>  | 1.50 ± 0.13 <sup>a</sup> |
| BR-a-RED                       | 1.00 ± 0.00 <sup>c</sup> | 1.66 ± 0.13 <sup>c</sup>  | 5.56 ± 0.71 <sup>b</sup>  | 5.55 ± 0.42 <sup>b</sup>  | 8.26 ± 0.62 <sup>a</sup> |
| BRZ2                           | 1.00 ± 0.00 <sup>b</sup> | 0.48 ± 0.19 <sup>b</sup>  | 0.92 ± 0.26 <sup>b</sup>  | 0.71 ± 0.21 <sup>b</sup>  | 5.19 ± 0.14 <sup>a</sup> |
| mono-TERP                      | 1.00 ± 0.00 <sup>d</sup> | 3.11 ± 0.22 <sup>c</sup>  | 4.89 ± 0.28 <sup>b</sup>  | 1.47 ± 0.12 <sup>d</sup>  | 8.56 ± 0.47 <sup>a</sup> |
| α-TERP                         | 1.00 ± 0.00 <sup>c</sup> | 0.62 ± 0.08 <sup>c</sup>  | 0.47 ± 0.06 <sup>c</sup>  | 3.64 ± 0.27 <sup>b</sup>  | 8.28 ± 0.42 <sup>a</sup> |
| CHS                            | 1.00 ± 0.00 <sup>c</sup> | 0.23 ± 0.02 <sup>d</sup>  | 1.62 ± 0.13 <sup>b</sup>  | 0.28 ± 0.02 <sup>d</sup>  | 8.61 ± 0.56 <sup>a</sup> |
| cambium of previous-year shoot |                          |                           |                           |                           |                          |
| ARF16                          | 1.00 ± 0.00 <sup>b</sup> | 0.80 ± 0.33 <sup>b</sup>  | 0.68 ± 0.30 <sup>b</sup>  | 1.95 ± 0.35 <sup>b</sup>  | 5.03 ± 0.09 <sup>a</sup> |
| AUX/IAA                        | 1.00 ± 0.00 <sup>b</sup> | 1.82 ± 0.37 <sup>b</sup>  | 2.29 ± 0.31 <sup>ab</sup> | 2.42 ± 0.48 <sup>ab</sup> | 3.40 ± 0.47 <sup>a</sup> |
| JAZa                           | 1.00 ± 0.00 <sup>d</sup> | 4.65 ± 0.38 <sup>b</sup>  | 2.68 ± 0.41 <sup>c</sup>  | 0.99 ± 0.18 <sup>d</sup>  | 8.33 ± 0.60 <sup>a</sup> |
| HPT1                           | 1.00 ± 0.00 <sup>a</sup> | 1.03 ± 0.17 <sup>a</sup>  | 1.25 ± 0.14 <sup>a</sup>  | 1.17 ± 0.31 <sup>a</sup>  | 1.55 ± 0.19 <sup>a</sup> |
| BR-a-RED                       | 1.00 ± 0.00 <sup>c</sup> | 0.61 ± 0.04 <sup>e</sup>  | 0.81 ± 0.06 <sup>d</sup>  | 2.75 ± 0.42 <sup>b</sup>  | 7.09 ± 0.79 <sup>a</sup> |
| BRZ2                           | 1.00 ± 0.00 <sup>b</sup> | 0.47 ± 0.11 <sup>b</sup>  | 2.72 ± 0.28 <sup>a</sup>  | 2.23 ± 0.26 <sup>a</sup>  | 2.61 ± 0.28 <sup>a</sup> |
| mono-TERP                      | 1.00 ± 0.00 <sup>a</sup> | 0.55 ± 0.34 <sup>a</sup>  | 0.38 ± 0.16 <sup>a</sup>  | 0.44 ± 0.25 <sup>a</sup>  | 0.87 ± 0.29 <sup>a</sup> |
| α-TERP                         | 1.00 ± 0.00 <sup>a</sup> | 0.40 ± 0.04 <sup>a</sup>  | 0.20 ± 0.04 <sup>a</sup>  | 0.48 ± 0.20 <sup>a</sup>  | 0.56 ± 0.30 <sup>a</sup> |
| CHS                            | 1.00 ± 0.00 <sup>a</sup> | 0.85 ± 0.08 <sup>ab</sup> | 0.56 ± 0.06 <sup>b</sup>  | 0.26 ± 0.05 <sup>b</sup>  | 0.47 ± 0.21 <sup>b</sup> |
| ARF 3/4                        | 1.00 ± 0.00 <sup>d</sup> | 2.17 ± 0.31 <sup>c</sup>  | 2.93 ± 0.28 <sup>c</sup>  | 4.41 ± 0.32 <sup>b</sup>  | 6.73 ± 0.52 <sup>a</sup> |
| young roots                    |                          |                           |                           |                           |                          |
| ARF16                          | 1.00 ± 0.00 <sup>b</sup> | 2.30 ± 0.18 <sup>b</sup>  | 2.19 ± 0.14 <sup>b</sup>  | 6.23 ± 0.50 <sup>a</sup>  | 7.92 ± 0.60 <sup>a</sup> |
| AUX/IAA                        | 1.00 ± 0.00 <sup>c</sup> | 1.12 ± 0.11 <sup>c</sup>  | 1.05 ± 0.14 <sup>c</sup>  | 8.65 ± 0.23 <sup>a</sup>  | 7.86 ± 0.43 <sup>b</sup> |
| JAZa                           | 1.00 ± 0.00 <sup>a</sup> | 1.31 ± 0.18 <sup>a</sup>  | 1.19 ± 0.10 <sup>a</sup>  | 1.04 ± 0.11 <sup>a</sup>  | 0.98 ± 0.07 <sup>a</sup> |
| HPT1                           | 1.00 ± 0.00 <sup>c</sup> | 1.69 ± 0.24 <sup>c</sup>  | 6.16 ± 0.61 <sup>b</sup>  | 4.63 ± 0.36 <sup>b</sup>  | 9.02 ± 0.29 <sup>a</sup> |
| BR-a-RED                       | 1.00 ± 0.00 <sup>d</sup> | 1.29 ± 0.10 <sup>d</sup>  | 2.16 ± 0.20 <sup>c</sup>  | 2.93 ± 0.19 <sup>b</sup>  | 6.14 ± 0.45 <sup>a</sup> |
| BRZ2                           | 1.00 ± 0.00 <sup>d</sup> | 1.65 ± 0.18 <sup>cd</sup> | 2.18 ± 0.08 <sup>c</sup>  | 3.83 ± 0.28 <sup>b</sup>  | 8.20 ± 0.54 <sup>a</sup> |
| mono-TERP                      | 1.00 ± 0.00 <sup>b</sup> | 0.93 ± 0.14 <sup>b</sup>  | 1.29 ± 0.18 <sup>b</sup>  | 1.12 ± 0.21 <sup>b</sup>  | 3.12 ± 0.35 <sup>a</sup> |
| α-TERP                         | 1.00 ± 0.00 <sup>c</sup> | 0.32 ± 0.13 <sup>c</sup>  | 0.32 ± 0.10 <sup>c</sup>  | 4.11 ± 0.36 <sup>b</sup>  | 7.75 ± 0.27 <sup>a</sup> |
| CHS                            | 1.00 ± 0.00 <sup>b</sup> | 1.02 ± 0.26 <sup>b</sup>  | 1.26 ± 0.19 <sup>b</sup>  | 2.97 ± 0.12 <sup>a</sup>  | 3.46 ± 0.30 <sup>a</sup> |
| ARF 3/4                        | 1.00 ± 0.00 <sup>d</sup> | 0.40 ± 0.07 <sup>e</sup>  | 6.87 ± 0.68 <sup>b</sup>  | 8.98 ± 0.25 <sup>a</sup>  | 4.52 ± 0.38 <sup>c</sup> |

Different letters within each row indicate significant differences ( $p < 0.05$ ), according to ANOVA, followed by Duncan's method (regular letters) or Kruskal–Wallis one-way ANOVA on ranks, followed by the Student–Newman–Keuls post hoc test (italic letters).

**Table S3.** Effect of light of different spectral compositions on antioxidant capacity, phenolic compound, total terpenoids and main photosynthetic pigments content in previous-year needles.

| Previous-year needles                         | Control             | WL                  | RL                  | FRL                 | RL+FRL              |
|-----------------------------------------------|---------------------|---------------------|---------------------|---------------------|---------------------|
| TEAC, μmol Trolox/g FW                        | 555.1 ± 63.5 a      | 532.8 ± 46.9 a      | 490.1 ± 16.1 a      | 563.4 ± 38.6 a      | 469.2 ± 41.9 a      |
| GAE, mg/g FW                                  | 22.2 ± 2.1 <i>a</i> | 21.1 ± 0.8 <i>a</i> | 21.8 ± 0.6 <i>a</i> | 24.5 ± 2.1 <i>a</i> | 20.1 ± 0.9 <i>a</i> |
| Flavonoids, mg catechin/g FW                  | 11.3 ± 1.5 a        | 10.7 ± 0.5 a        | 10.2 ± 0.6 a        | 11.5 ± 0.7 a        | 9.8 ± 0.6 a         |
| Catechins+proanthocyanidins, mg catechin/g FW | 30.9 ± 3.9 a        | 33.9 ± 3.2 a        | 33.1 ± 1.9 a        | 35.0 ± 1.8 a        | 33.0 ± 2.3 a        |
| Proanthocyanidins, mg cyaniding/g FW          | 11.1 ± 0.9 a        | 12.4 ± 0.8 a        | 11.7 ± 0.4 a        | 12.4 ± 0.3 a        | 11.5 ± 0.4 a        |
| Terpenoids, mg/g DW                           | 5.96 ± 0.36 a       | 6.45 ± 0.18 a       | 6.25 ± 0.47 a       | 7.12 ± 0.29 a       | 6.06 ± 0.27 a       |
| Chl <i>a</i> , mg/g DW                        | 2.66 ± 0.12 a       | 2.79 ± 0.24 a       | 2.96 ± 0.13 a       | 2.92 ± 0.29 a       | 2.78 ± 0.14 a       |
| Chl <i>b</i> , mg/g DW                        | 1.23 ± 0.06 a       | 1.27 ± 0.11 a       | 1.33 ± 0.08 a       | 1.55 ± 0.17 a       | 1.37 ± 0.09 a       |
| Carotenoids, mg/g DW                          | 0.54 ± 0.02 a       | 0.57 ± 0.05 a       | 0.61 ± 0.03 a       | 0.65 ± 0.06 a       | 0.58 ± 0.03 a       |
| Chl <i>a</i> /Chl <i>b</i>                    | 2.16 ± 0.02 a       | 2.19 ± 0.02 a       | 2.24 ± 0.04 a       | 1.89 ± 0.03 c       | 2.04 ± 0.04 b       |
| Carotenoids/chlorophylls <i>a+b</i> ratio     | 0.139 ± 0.001 b     | 0.139 ± 0.001 b     | 0.143 ± 0.001 ab    | 0.145 ± 0.002 a     | 0.141 ± 0.002 ab    |

Different letters within each row indicate significant differences ( $p < 0.05$ ) according to ANOVA on ranks followed by Duncan's Multiple Range post hoc test (regular letters) or Kruskal–Wallis one-way ANOVA on ranks followed by Student–Newman–Keuls post hoc test (*italic letters*). TEAC, Trolox equivalent antioxidant capacity; GAE, gallic acid equivalents.

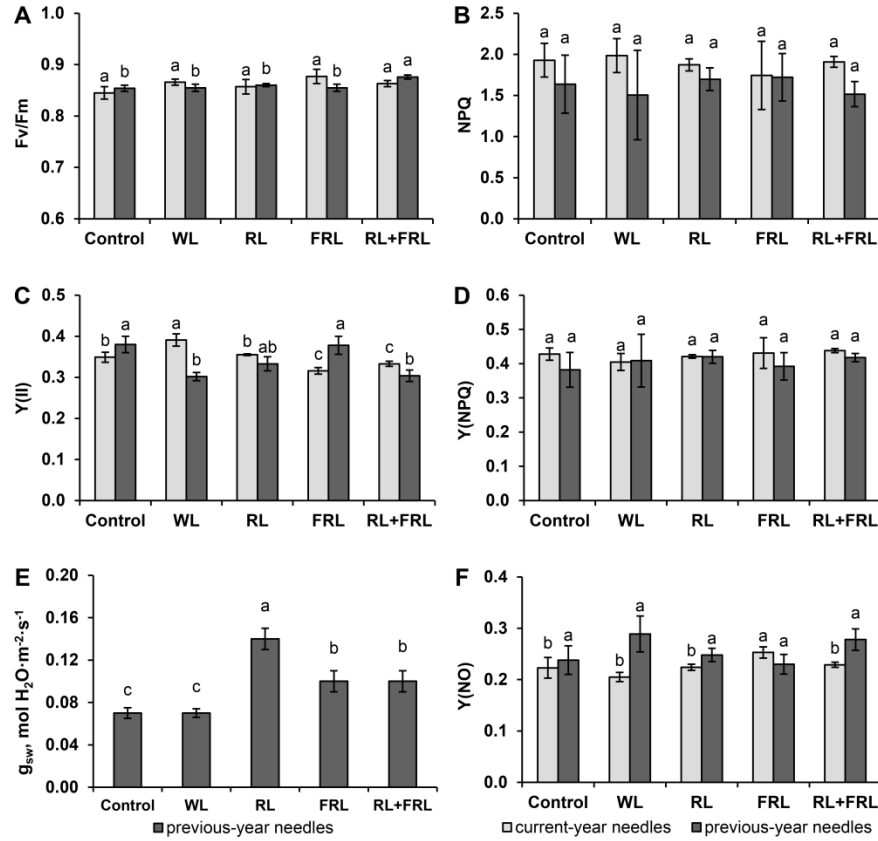

**Figure S1.** Effect of additional light on stomatal conductance ( $g_{sw}$ , mol  $H_2O$   $m^{-2}s^{-1}$ ) (E) and the main parameters of chlorophyll *a* fluorescence:  $F_v/F_m$  (the maximum quantum yield of PSII) (A);  $Y(II)$  (PSII effective quantum yield) (C); NPQ (non-photochemical fluorescence quenching) (B);  $Y(NO)$  (quantum yield of non-regulated non-photochemical energy dissipation in PSII) (F),  $Y(NPQ)$  (quantum yield of regulated non-photochemical energy dissipation in PSII) (D) in the previous-year and current-year needles of Scots pine.
